# Supplementary material for: The Role of Decompressive Craniectomy in Limited Resource Environments
Source: PubMed Central journal article supplement (PMC6399379; doi:10.3389/fneur.2019.00112), 2019-02-26
Supplement: Data_Sheet_1.pdf [file Data_Sheet_1.pdf]

**1. Search Strategy:**

"neurology"[MeSH Terms] AND "emergencies"[MeSH Terms] OR (("neurosurgical procedures"[MeSH Terms] OR "neurosurgery"[MeSH Terms]) AND "emergencies"[MeSH Terms] AND "decompressive craniectomy"[MeSH Terms]) OR ("decompressive craniectomy"[MeSH Terms] AND ("income"[MeSH Terms] OR "income"[All Fields]) AND countries [All Fields]) OR (low [All Fields] AND ("health resources"[MeSH Terms] OR "health resources"[All Fields] OR "resources"[All Fields]) AND settings[All Fields]) AND ("loattrfull text"[sb] AND ("2001/01/01"[PDAT] : "2018/09/01"[PDAT]) AND "humans"[MeSH Terms]).

Supplemental Table 1

| TRAUMATIC BRAIN INJURY                       |                    |                                  |                |                                                                                    |                                                          |                                                                      |                                                                                                                                                        |                                                                                                                                                 |
|----------------------------------------------|--------------------|----------------------------------|----------------|------------------------------------------------------------------------------------|----------------------------------------------------------|----------------------------------------------------------------------|--------------------------------------------------------------------------------------------------------------------------------------------------------|-------------------------------------------------------------------------------------------------------------------------------------------------|
| Region                                       | Country            | Author                           | Year           | Procedure type                                                                     | Type and Size of population                              | Type of study                                                        | Outcome                                                                                                                                                |                                                                                                                                                 |
| Latin American & Caribbean and North America | Argentina          | Pereyra L, et al. (1)            | 2012           | 206 patients were subjected to DC. The study did not specify the type of DC.       | 698 pediatric and adult patients                         | Retrospective, observational, cross-sectional study in single center | Mortality rate was 48% after DC, and 65% without DC.                                                                                                   |                                                                                                                                                 |
|                                              |                    | Toledo JA, et al. (2)            | 2016           | 42% primary DC, 6% secondary DC. The study did not specify the type of DC.         | 102 adult patients (>14 years) with head gunshot wounds. | Retrospective observational descriptive study                        | 34% had GOS 4 - 5 points, 24% GOS 2 - 3 points. Mortality was 42%.                                                                                     |                                                                                                                                                 |
|                                              | Colombia           | Rubiano AM, et al. (3)           | 2009           | Unilateral Early DC in 16 patients compared with non-DC management in 20 patients. | 36 pediatric and adult patients                          | Case control study with a historical control group                   | Early DC group: 43.7% had GOS 4-5 and 5 patients died. Non-DC group: 35% had GOS 2-3 and 13 patients died.                                             |                                                                                                                                                 |
|                                              |                    | Charry JD, et al. (4)            | 2016           | Hemispheric craniectomy                                                            | 54 adult patients                                        | Retrospective observational study                                    | Forty (74.1%) of the patients survived and 36 (90%) of them had favorable GOS (4-5)                                                                    |                                                                                                                                                 |
|                                              |                    | Charry JD, et al. (5)            | 2016           | Unilateral early DC                                                                | 106 severe TBI adult patients                            | Retrospective observational study                                    | 74.6% of the patients survived and 66.1% of them had favorable GOS (4-5) at 12 months.                                                                 |                                                                                                                                                 |
|                                              | Cuba               | Lacerda AJ, et al. (6)           | 2013           | bi-frontal, unilateral and bilateral DC                                            | 12 pediatric patients                                    | Case series                                                          | After one year, 58.33% had slight sequelae or no sequelae and 25% died.                                                                                |                                                                                                                                                 |
|                                              |                    | Lacerda AJ, et al. (7)           | 2018           | bi-frontal and unilateral DC                                                       | 36 pediatric patients                                    | Descriptive study                                                    | GOS at 1 year of evolution showed 59.09% with grade V and a mortality of 22.73% (grade I).                                                             |                                                                                                                                                 |
|                                              | Mexico             | Martínez-Bustamante D, et al.(8) | 2014           | Not specify the type of DC                                                         | 52 adult patients with penetrating TBI (PTBI)            | Retrospective observational study                                    | General mortality was 8%. Mortality in the GCS 3 to 5 points group was 43%, from the 6 to 8 points it was 6%, and no deaths in the GCS 9 to 15 points. |                                                                                                                                                 |
|                                              | Sub-Saharan Africa | Nigeria                          | Adeleye AO (9) | 2010                                                                               | Hemispheric DC                                           | 17 Adults                                                            | Case series                                                                                                                                            | 56% of cases with severe head injury had good outcome and the mortality rate in this group was 44%, while 66.7% of the moderate head injury had |

|                   |                     |      |                                                                  |                                             |                                        |                                                                                                                                                       |
|-------------------|---------------------|------|------------------------------------------------------------------|---------------------------------------------|----------------------------------------|-------------------------------------------------------------------------------------------------------------------------------------------------------|
|                   |                     |      |                                                                  |                                             |                                        | good outcome and the mortality rate was 16.7%.                                                                                                        |
|                   | Ojo OA et al (10)   | 2015 | Hemispheric DC                                                   | 10 Adults                                   | Case series                            | 60% of patients after 6 months had GOS 3-5, while 40% died within the first week after DC.                                                            |
| South Africa      | Figaji AA et al(11) | 2003 | Hemispheric DC                                                   | 5 pediatric patients                        | Case series                            | GOS<br>4-5:100%                                                                                                                                       |
|                   | Enslin JN (12)      | 2011 | Hemispheric and bifrontal DC                                     | 76 Adults (>14years)                        | Retrospective observational study      | GOS<br>1: 44,4%<br>1-3:66,7%<br>4-5:33,33%                                                                                                            |
| Cameroon          | Motah M, et al.(13) | 2014 | Bifrontal DC (6)<br>Hemicraniectomy (7)                          | 13 Adults                                   | Case series                            | 10 patients (76.93%), had favorable outcome, 1 remained in vegetative state and 1 died                                                                |
| East Asia Pacific | Tang, Z, et al.(14) | 2018 | Unilateral DC 86.1%, bilateral DC 11.1%, and bifrontal DC 2.8%.  | 36 pediatric patients                       | Retrospective observational study      | 38.9% died within 14 days after DC                                                                                                                    |
|                   | Mao, X, et al(15)   | 2015 | Unilateral and bilateral                                         | 207 adults patients                         | Retrospective observational study      | The mortality rate was 39.76% in the DC group, while it was 87.80% in the Conservative Care group                                                     |
|                   | Bao, Y, et al (16)  | 2010 | Bilateral DC                                                     | 37 adults patients                          | Retrospective observational study      | 54.1% had favorable outcomes and 45.9% had unfavorable outcomes                                                                                       |
|                   | Wang, Z et al (17)  | 2017 | Bifrontal                                                        | 56 adults patients                          | Retrospective observational study      | 58.9% had recovered                                                                                                                                   |
|                   | Yu, Pm, et al (18)  | 2015 | unspecified                                                      | 223 adults patients                         | Retrospective observational study      | Mortality 32.1%. DC reduce the mortality, but failed to improve the long-term prognosis according to the GOS.                                         |
|                   | Yuan, Q, et al (19) | 2013 | Unilateral and bilateral frontal craniectomy                     | 164 pediatric and adults patients (14 – 83) | Retrospective cohort study.            | 22.0% died, 42% had GOS score of 4 to 5 and 36.0% vegetative.                                                                                         |
|                   | Wen, L, et al (20)  | 2011 | Unilateral and bilateral frontal craniectomy                     | 44 adults patients                          | Retrospective observational study      | The mortality after 1 month of early DC was 16% compared with 15,8% of mortality after late DC, 6 months mortality 20% of early DC and 21% of late DC |
|                   | Qiu, W, et al (21)  | 2009 | unilateral DC and unilateral routine temporoparietal craniectomy | 74 adults patients                          | Prospective randomized clinical trial. | Mortality one month after surgery, was 27% in unilateral DC and 57 in temporoparietal craniectomy. 56.8% of                                           |

|                                          |                         |                           |                                                |                                                   |                                   |                                                                                                                                                      |                                                                                                                                            |
|------------------------------------------|-------------------------|---------------------------|------------------------------------------------|---------------------------------------------------|-----------------------------------|------------------------------------------------------------------------------------------------------------------------------------------------------|--------------------------------------------------------------------------------------------------------------------------------------------|
|                                          |                         |                           |                                                |                                                   |                                   | patients with good neurological recovery after DC, and 32.4% after temporoparietal craniectomy                                                       |                                                                                                                                            |
|                                          | LI, G, et al (22)       | 2008                      | large DC and routine decompressive craniectomy | 263 pediatric and adults patients                 | Retrospective observational study | GOS score 3-5 in 71% after large DC and 58.6% after routine decompressive craniectomy                                                                |                                                                                                                                            |
| Malaysia                                 | Sharda P, et al (23)    | 2014                      | Unspecified                                    | 110 adult and pediatric patients                  | Retrospective observational study | Mortality of 35%. Post-operative hypoxia, unmaintained CPP and unstable BP were predictors of poor outcomes.                                         |                                                                                                                                            |
| Mongolia                                 | Wang, Z, et al (24)     | 2017                      | Bifrontal                                      | 56 adults patients                                | Retrospective observational study | 58.9% had good prognosis, 21.4% had mild disability, 8.9% had severe disability, 5.3% had persistent vegetative status, and 5.3% dead.               |                                                                                                                                            |
| Thailand                                 | Limpastan K, et al (25) | 2013                      | Unilateral and Bilateral DC                    | 159 adult and pediatric patients                  | Retrospective observational study | Mortality after DC was 44.65%. Pre-operative GCS of 6 and higher had a significantly lower mortality when compared with those who scored 5 or lower. |                                                                                                                                            |
| Europe & Central Asia                    | Turkey                  | Kalayci M, et al (26)     | 2013                                           | Unilateral and bilateral DC                       | 34 adult and pediatric patients   | Retrospective observational study                                                                                                                    | After 6 months of DC 47.0% dead and 53.0% survived.                                                                                        |
|                                          |                         | Cavuşoğlu H, et al (27)   | 2010                                           | Early unilateral DC                               | 33 adult and pediatric patients   | Retrospective observational study                                                                                                                    | Favorable outcome (mRS 0-3) in 48.5% of patients after one year.                                                                           |
|                                          |                         | Ucar, T, et al (28)       | 2005                                           | Unilateral and bilateral                          | 100 adult and pediatric patients  | Retrospective observational study                                                                                                                    | 84% unfavorable outcome and 16% favorable outcome                                                                                          |
| Middle East, North Africa and South Asia | Iran                    | Khalili, H., et al. (29)  | 2017                                           | Unilateral and bilateral                          | 142 adult patients                | Retrospective, cross-sectional study                                                                                                                 | Overall favorable, low GCS on admission and post-operative hydrocephalus associated with unfavorable outcome                               |
|                                          | Jordan                  | Jamous, M., et al. (30)   | 2010                                           | Bifrontal craniectomy in bilaterally fixed pupils | 5 adult patients                  | Case series                                                                                                                                          | Controlled ICP but all the patients died in 30 days of trauma                                                                              |
|                                          | Afghanistan             | Ragel, B.T., et al. (31)  | 2010                                           | Unilateral and bilateral                          | 90 adult patients                 | Retrospective observational study                                                                                                                    | Authors recommended L.G.Kempe incision                                                                                                     |
|                                          | Afghanistan and Iraq    | Ecker, R. D., et al. (32) | 2011                                           | Hemicraniectomy, Bilateral and Bicompartamental   | 33 Adult patients                 | Retrospective observational study                                                                                                                    | Long-term follow-up GOS<br>1: 23%<br>2-3: 17%<br>4-5: 60%<br>Systemic infections and cardiovascular complications result in worse outcomes |
|                                          |                         | Bell, R. S., et al. (33)  | 2010                                           | Unilateral and bilateral                          | 188 Adult patients                | Retrospective observational study                                                                                                                    | Favorable. Authors recommended hemicraniectomy as damage-control before long                                                               |

|  |          |                             |      |                               |                               |                                      |                                                                                                                                                                    |
|--|----------|-----------------------------|------|-------------------------------|-------------------------------|--------------------------------------|--------------------------------------------------------------------------------------------------------------------------------------------------------------------|
|  |          |                             |      |                               |                               |                                      | distance transfer                                                                                                                                                  |
|  |          | Roberts, S. A., et al. (34) | 2016 | Unilateral and bilateral      | 14 Adult patients             | Case series                          | Favorable. Median GOS 4 (50%) at final follow-up.                                                                                                                  |
|  | Pakistan | Waqas, M., et al (35)       | 2018 | Unilateral and Bilateral      | 40 adult patients             | Cross-sectional study                | Mean GOSE=5.35 +/-1,9<br>Quality of life after traumatic brain injury (QOLIBRI)=59,65 +/-21,27                                                                     |
|  |          | Khan et al (36)             | 2018 | Unilateral and bilateral      | 98 adult patients             | Retrospective, cross-sectional study | GOSE > 5 in 45.9%. Young age and lower GCS at presentation was associated with worse survival. GCS score on discharge was a strong predictor of functional outcome |
|  |          | Qasmi et al. (37)           | 2015 | Unilateral                    | 39 adult patients             | Observational, cross-sectional study | 53.8% had favorable outcome                                                                                                                                        |
|  |          | Prasad, G. L., et al. (38)  | 2015 | Unilateral and bilateral      | 71 Pediatric                  | Retrospective observational study    | Favorable. Survival advantage in 50% with severe TBI. GOSE: 7-8                                                                                                    |
|  | India    | Sinha, S., et al. (39)      | 2015 | Unilateral and bilateral      | 1236 adult patients           | Retrospective observational study    | Follow-up of surviving 7.5% persistent vegetative state<br>78% favorable outcome                                                                                   |
|  |          | Choudhary NK et al (40)     | 2018 | 29%Bifrontal<br>71%Unilateral | 85 Adults (male:famale 1,8:1) | Retrospective observational study    | GOS: EARLY SURGERY/LATE SURGERY<br>1:10,6%/22,4%<br>2: 12,1%/21,5%<br>3: 16,7%/21,5%<br>4: 28,8%/10,5%<br>5: 31,8%/15,8%                                           |
|  |          |                             |      |                               |                               |                                      |                                                                                                                                                                    |

- PEREYRA C, BENITO MORI L, SCHOON P, et al. Decompressive craniectomy and brain death prevalence and mortality: 8-year retrospective review. *Transplant Proc.* 2012 Sep;44(7):2181-4. doi: 10.1016/j.transproceed.2012.07.107.
- TOLEDO JA, RE M, PENDINO A, CANULLO ML, et al. Heridos de arma de fuego en cráneo: análisis de 102 casos en población civil en una única institución. *Rev Argent Neuroc.* 2016;30(4):143-9
- RUBIANO AM, VILLARREAL W, HAKIM EJ, et al. Early decompressive craniectomy for neurotrauma: an institutional experience. *Ulus Travma Acil Cerrahi Derg.* 2009 Jan;15(1):28-38.
- CHARRY JD, RUBIANO AM, PUYANA JC, et al. Damage control of civilian penetrating brain injuries in environments of low neuro-monitoring resources. *Br J Neurosurg.* 2016;30(2):235-9. doi: 10.3109/02688697.2015.1096905.
- CHARRY JD, RUBIANO AM, NIKAS CV, ORTIZ JC, PUYANA JC, CARNEY N, ADELSON PD: Results of early cranial decompression as an initial approach for damage control therapy in severe traumatic brain injury in a hospital with limited resources. *J Neurosci Rural Pract,* 2016, 7(1):7-12
- LACERDA AJ, PEREZ DA, DIAZ JA, et al. Craniectomía descompresiva en el manejo del traumatismo cráneo-encefálico grave en pediatría. *Rev Cubana Neurol Neurocir.* 2013;3(1):38-43
- LACERDA AJ, PEREZ DA, PAZOS MM, et al. Decompressive Craniectomy in Pediatric Severe Head Trauma. *Int J Pediatr Res.* 2018;4(1):033. doi.org/10.23937/2469-5769/1510033
- MARTÍNEZ-BUSTAMANTE D, PÉREZ-CÁRDENAS S, ORTIZ-NIETO JM, et al. Craniocerebral gunshot wounds in civilian population: Analysis of experience in a single center in Monterrey, México. *Cir Cir.* 2015 Mar-Apr;83(2):94-9. doi: 10.1016/j.circir.2015.04.002.
- ADELEYE AO, Decompressive craniectomy for traumatic brain injury in a developing country: An initial observational study *Indian Journal of Neurotrauma (IJNT)* 2010, Vol. 7, No. 1, pp. 41-46
- OJO, O A .BANKOLE, O B, KANU, O O, EGHOSA, M, OLATOSI, O, Early decompressive craniectomy for traumatic brain injury in resource poor centres:a tertiary institution experience. *Niger Postgrad Med J* 2015 Mar;22(1):45-9.
- FIGAJI AA, FIEGGEN AG, PETER JC. Early decompressive craniotomy in children with severe traumatic brain injury, *Childs Nerv Syst* (2003) 19:666-673

12. ENSLIN JM, Outcomes of decompressive craniectomy in adults with severe traumatic brain injury –The Groote Schuur Hospital Experience
13. MOTAH M, UDUMA UF, NDOUMBE A. Surgical Management of Severe Head Injury with Cerebral Herniation. *J Neuroinfect Dis.* 2014;5(1):136.
14. Tang, Z., Huang, Q., Zhang, J., Yang, R., Wei, W., & Liu, H. (2018). Fourteen-Day Mortality in Pediatric Patients with Traumatic Brain Injury After Early Decompressive Craniectomy: A Single-Center Retrospective Study. *World Neurosurgery.* doi: 10.1016/j.wneu.2018.07.173
15. Mao, X., Hao, S., Tao, X., Hou, Z., Li, H., & Tian, R. et al. (2015). Decompressive craniectomy for severe traumatic brain injury patients with fixed dilated pupils. *Therapeutics And Clinical Risk Management*, 1627. doi: 10.2147/tcrm.s89820
16. Bao, Y., Liang, Y., Gao, G., Pan, Y., Luo, Q., & Jiang, J. (2010). Bilateral Decompressive Craniectomy for Patients with Malignant Diffuse Brain Swelling after Severe Traumatic Brain Injury: A 37-Case Study. *Journal Of Neurotrauma*, 27(2), 341-347. doi: 10.1089/neu.2009.1040
17. Wang, Z., Su, N., Wu, R., Zhang, Y., Zhang, X., & Qi, J. et al. (2017). Decompressive Craniectomy With Bifrontal Coronal Incision in the Management of Fronto-Temporal Contusion and Laceration for Early Cranioplasty. *Journal Of Craniofacial Surgery*, 28(6), 1442-1444. doi: 10.1097/scs.0000000000003497
18. Yu, P., Tian, Q., Wen, X., Zhang, Z., & Jiang, R. (2015). Analysis of Long-Term Prognosis and Prognostic Predictors in Severe Brain Injury Patients Undergoing Decompressive Craniectomy and Standard Care. *Journal of Craniofacial Surgery*, 26(7), e635–e641. doi:10.1097/scs.0000000000002063
19. Yuan, Q., Liu, H., Wu, X., Sun, Y., & Hu, J. (2013). Comparative study of decompressive craniectomy in traumatic brain injury with or without mass lesion. *British Journal of Neurosurgery*, 27(4), 483–488. doi:10.3109/02688697.2013.763897
20. Wen, L., Wang, H., Wang, F., Gong, J. B., Li, G., Huang, X., Yang, X. F. (2011). A prospective study of early versus late craniectomy after traumatic brain injury. *Brain Injury*, 25(13-14), 1318–1324. doi:10.3109/02699052.2011.608214
21. Qiu, W., Guo, C., Shen, H., Chen, K., Wen, L., & Huang, H. et al. (2009). Effects of unilateral decompressive craniectomy on patients with unilateral acute post-traumatic brain swelling after severe traumatic brain injury. *Critical Care*, 13(6), R185. doi: 10.1186/cc8178
22. LI, G., WEN, L., YANG, X., ZHENG, X., ZHAN, R., & LIU, W. (2008). Efficacy of large decompressive craniectomy in severe traumatic brain injury. *Chinese Journal Of Traumatology (English Edition)*, 11(4), 253-256. doi: 10.1016/s1008-1275(08)60052-8
23. Sharda P, Haspani S, Idris Z. Factors prognosticating the outcome of decompressive craniectomy in severe traumatic brain injury: A Malaysian experience. *Asian J Neurosurg.* 2014;9(4):203-12.
24. Wang, Z., Su, N., Wu, R.-L., Zhang, Y.-S., Zhang, X.-J., Qi, J.-J., ... Wang, J.-Q. (2017). Decompressive Craniectomy With Bifrontal Coronal Incision in the Management of Fronto-Temporal Contusion and Laceration for Early Cranioplasty. *Journal of Craniofacial Surgery*, 28(6), 1442–1444. doi:10.1097/scs.0000000000003497
25. Limpastan K, Norasetthada T, Watcharasaksilp W, Vaniyapong T. Factors influencing the outcome of decompressive craniectomy used in the treatment of severe traumatic brain injury. *J Med Assoc Thai.* 2013;96(6):678-82.
26. Kalayci M, Aktunç E, Gül S, et al. Decompressive craniectomy for acute subdural haematoma: an overview of current prognostic factors and a discussion about some novel prognostic parametres. *J Pak Med Assoc.* 2013;63(1):38-49.
27. Cavuşoğlu H, Kaya RA, Türkmenoğlu ON, Aydin Y. Value of early unilateral decompressive craniectomy in patients with severe traumatic brain injury. *Ulus Travma Acil Cerrahi Derg.* 2010;16(2):119-24.
28. Ucar, T., Akyuz, M., Kazan, S., & Tuncer, R. (2005). Role of Decompressive Surgery in the Management of Severe Head Injuries: Prognostic Factors and Patient Selection. *Journal of Neurotrauma*, 22(11), 1311–1318. doi:10.1089/neu.2005.22.1311.
29. KHALILI, H., NIAKAN, A., GHAFFARPASAND, F., KIANI, A. & BEHJAT, R. 2017. Outcome Determinants of Decompressive Craniectomy in Patients with Traumatic Brain Injury; A Single Center Experience from Southern Iran. *Bull Emerg Trauma*,5,190-196.
30. JAMOUS, M., BARBARAWI, M., SAMRAH, S., KHABAZ, M. N., AL-JARRAH, M. & DAUOD, S. 2010. Emergency decompressive craniectomy for trauma patients with Glasgow Coma Scale of 3 and bilateral fixed dilated pupils. *Eur J Trauma Emerg Surg*,36,465-9.
31. RAGEL, B. T., KLIMO, P., MARTIN, J. E., TEFF, R. J., BAKKEN, H. E. & ARMONDA, R. A. 2010. Wartime decompressive craniectomy: technique and lessons learned. *Neurosurg Focus*,28,E2.
32. ECKER, R. D., MULLIGAN, L. P., DIRKS, M., BELL, R. S., SEVERSON, M. A., HOWARD, R. S. & ARMONDA, R. A. 2011. Outcomes of 33 patients from the wars in Iraq and Afghanistan undergoing bilateral or bicompartmental craniectomy. *J Neurosurg*,115,124-9.
33. BELL, R. S., MOSSOP, C. M., DIRKS, M. S., STEPHENS, F. L., MULLIGAN, L., ECKER, R., NEAL, C. J., KUMAR, A., TIGNO, T. & ARMONDA, R. A. 2010. Early decompressive craniectomy for severe penetrating and closed head injury during wartime. *Neurosurg Focus*,28,E1.
34. ROBERTS, S. A., TOMAN, E., BELLI, A. & MIDWINTER, M. J. 2016. Decompressive craniectomy and cranioplasty: experience and outcomes in deployed UK military personnel. *Br J Neurosurg*,30,529-35.

35. WAQAS, M., MALIK, N., SHAMIM, M. S., NATHANI, K. R. & ABBASI, S. A. 2018. Quality of Life Among Patients Undergoing Decompressive Craniectomy for Traumatic Brain Injury Using Glasgow Outcome Scale Extended and Quality of Life After Brain Injury Scale. *World Neurosurg*,116,e783-e790.
36. Khan, F., Valliani, A., Rehman, A., & Bari, M. E. (2018). Factors affecting functional outcome after decompressive craniectomy performed for traumatic brain injury: A retrospective, cross-sectional study. *Asian Journal of Neurosurgery*, 13(3), 730.
37. Qasmi, S. A., Ghaffar, A., Hussain, Z. & Akram M. 2015. Outcome of descompressive craniectomy (DC)for severe traumatic brain injury (STBI) in adults. *Pak Armed Forces Med J* 2015; 65(5): 674-78.
38. PRASAD, G. L., GUPTA, D. K., MAHAPATRA, A. K. & SHARMA, B. S. 2015. Surgical results of decompressive craniectomy in very young children: A level one trauma centre experience from India. *Brain Inj*,29,1717-24.
39. SINHA, S., RAHEJA, A., GARG, M., MOORTHY, S., AGRAWAL, D., GUPTA, D. K., SATYARTHEE, G. D., SINGH, P. K., BORKAR, S. A., GURJAR, H., TANDON, V., PANDEY, R. M. & SHARMA, B. S. 2015. Decompressive craniectomy in traumatic brain injury: A single-center, multivariate analysis of 1,236 patients at a tertiary care hospital in India. *Neurol India*,63,175-83.
40. CHOUDHARY, N. K. & BHARGAVA, R. 2018. Decompressive Craniectomy in Diffuse Traumatic Brain Injury: An Industrial Hospital Study. *Asian J Neurosurg*,13,314-318.

**Supplemental Table 2**

| STROKE                                       |          |                              |      |                       |                                                                                |                                           |                                                                                                      |
|----------------------------------------------|----------|------------------------------|------|-----------------------|--------------------------------------------------------------------------------|-------------------------------------------|------------------------------------------------------------------------------------------------------|
| Region                                       | Country  | Author                       | Year | DC Procedure type     | Type and Size of population                                                    | Type of study                             | Outcome                                                                                              |
| Latin American & Caribbean and North America | Brazil   | Vital-Bezzerra R, et al. (1) | 2016 | Unilateral            | 60 Adults                                                                      | Retrospective observational study         | mRS<br>5-6: 76% (>60yrs)<br>5-6: 44% (<60yrs)<br>0-4: 24% (>60 yrs)                                  |
|                                              |          | Rabelo NN, et al. (2)        | 2017 | Unilateral            | 37 Adults with aneurysmal subarachnoid hemorrhage or unbroken aneurysms.       | Cross-sectional study                     | Survival 60% (14 asymptomatic, 8 with deficit)<br>Death 40%                                          |
|                                              | Colombia | Silva F, et al.(3)           | 2011 | Unilateral            | 18 Adults<br>38,8% with DC<br>61,1% with conventional medical treatment (CMT). | Case series                               | Mortality<br>DC/ CMT<br>14,2%/ 54,5%                                                                 |
| East Asia Pacific                            | China    | Hao, Z, et al (4)            | 2014 | Unilateral            | 219 adults patients (Of them, 31 patients was DC)                              | Cohort Study                              | mRS<br>DC %/NoDC%<br>2: 3.2 / 0.5<br>3:29.0 / 12.8<br>4: 19.4/ 12.8<br>5: 9.7 /12.8<br>6: 38.7/ 61.2 |
|                                              |          | Shao, A, et al (5)           | 2013 | Unilateral            | 131 adults (85 witt improve D and 46 with Routine DC)                          | Comparative, retrospective study          | Mortality<br>Improve/Routine<br>29,41% /63.0 %                                                       |
|                                              |          | Zhao, J, et al (6)           | 2012 | Large hemicraniectomy | 47 adults (24 with DC, 23 with CMT)                                            | Prospective, randomized, controlled trail | DC/CMT<br>Mortality 6 months:<br>12,5%/60,9%<br><br>Mortality 12 months:<br>16,7%/69,6%              |

|                                          |          |                           |      |                                         |                                                                               |                                              |                                                                                                                                                                                                                  |
|------------------------------------------|----------|---------------------------|------|-----------------------------------------|-------------------------------------------------------------------------------|----------------------------------------------|------------------------------------------------------------------------------------------------------------------------------------------------------------------------------------------------------------------|
|                                          |          | Chen, C.-C, et al (7)     | 2007 | Large Decompressive hemicraniectomy     | 60 adults patients                                                            | Retrospective observational study            | Survived: 80%<br>Mortality<br>- 30 days: 20%<br>- 12 months: 26,6%<br>BI* >60: 65,9%<br>*Barthel Index                                                                                                           |
|                                          |          | Yao, Y, et al (8)         | 2005 | Unilateral DC                           | 25 elderly patients with younger patients.                                    | Retrospective observational study            | Mortality<br><60 years: 7,7%<br>>60 years: 33,3%.                                                                                                                                                                |
|                                          |          | Yang, X, et al (9)        | 2005 | Unilateral DC                           | 24 adults patients                                                            | Retrospective observational study            | Mortality was 10.0% after DC compared with 64.2% after medical treatment alone                                                                                                                                   |
|                                          |          | Cho, D, et al (10)        | 2003 | Unilateral DC                           | 52 adults patients                                                            | Retrospective observational study            | 8.3% of mortality at 30 days after ultra-early DC, 36.7% after DC beyond 6 hours, and 80% no operation.                                                                                                          |
|                                          |          | Zhao, B, et al (11)       | 2015 | Primary Unilateral DC                   | 24 adults patients with MCA aneurysm with associated intracerebral hemorrhage | Multicenter retrospective case-control study | 58% patients had a favorable outcome and the mortality was 29%                                                                                                                                                   |
|                                          | Malaysia | Raffiq, M, et al (12)     | 2014 | Unilateral DC                           | 125 adults patients                                                           | Retrospective observational study            | Mortality was 30.0% after DC and 54.3% after medical treatment, favorable outcome was in 37.8% after DC and 2.9% after medical treatment at 30 days                                                              |
| Europe & Central Asia                    | Turkey   | Gulensoy, B, et al.(13)   | 2014 | Decompressive hemicraniectomy           | 42 adults patients                                                            | Retrospective observational study            | 27 cases with unfavorable outcome and 15 with favorable outcome.                                                                                                                                                 |
|                                          |          | Kilincer, C., et al (14)  | 2005 | Unilateral                              | 32 adults patients                                                            | Non-randomized prospective study             | Mortality after one month 31% and most of the surviving patients were severely disabled (RS 4 or 5)                                                                                                              |
| Middle East, North Africa and South Asia | Iran     | Rahmanian, A, et al. (15) | 2014 | Hemicraniectomy                         | 60 adult patients                                                             | Case-control study                           | Mortality was 20% after DC and 67% after medical treatment                                                                                                                                                       |
|                                          |          | Rasras, S, et al. (16)    | 2018 | Hemicraniectomy without clot evacuation | 30 adult patients                                                             | Randomized clinical trial                    | DC without clot evacuation in deep seated ICH can be accomplished with identical mortality and outcome in comparison to patient that undergone clot evacuation. Mortality was 30.8% in case and 29.4% in control |



|  |          |                            |      |                                                   |                                   |                                   |                                                                                                                                                          |
|--|----------|----------------------------|------|---------------------------------------------------|-----------------------------------|-----------------------------------|----------------------------------------------------------------------------------------------------------------------------------------------------------|
|  | Egypt    | Moussa, W. M, et al. (17)  | 2017 | Hemicraniectomy with expansile duraplasty         | 40 adult patients (DC and non-DC) | Randomized clinical trial         | At 6 months' follow-up, 14 (70 %) patients of group A (DC) had favorable outcome as compared to 4 (20 %) patients of group B (non-DC)                    |
|  | Pakistan | Kamal Alam, B, et al. (18) | 2017 | Hemicraniectomy                                   | 34 adult patients                 | Longitudinal cohort study         | Mild improvements in functional outcomes after six months of malignant MCA infarcts but with poor functional outcomes as a whole (mRS > 4 and mBI < 60). |
|  |          | Khatri, I. A, et al. (19)  | 2008 | Hemicraniectomy                                   | 5 adult patients                  | Case series                       | Not mortality<br>Complication:<br>60%: aspiration pneumonia.<br>40% septicaemia in 20% seizures and status epilepticus.                                  |
|  |          | Khan et al (20)            | 2010 | Hemicraniectomy (occipital) for cerebellar stroke | 6 adult patients                  | Case series                       | GOS<br>5 : 83,4 %<br>1: 16,6%                                                                                                                            |
|  | India    | Rai, V. K, et al.(21)      | 2014 | Hemicraniectomy                                   | 60 adult patients                 | Prospective observational study   | Favorable. Reduced mortality and disability. Mortality at 1 year was 38% in DC and 83% in Medical treatment                                              |
|  |          | Bansal, H, et al. (22)     | 2015 | Hemicraniectomy                                   | 53 adult patients                 | Retrospective observational study | DC has reduced morbidity and mortality especially in people aged below 60 years and those operated within 48 h of malignant MCA stroke                   |
|  |          | Kumar, A, et al. (23)      | 2013 | Hemicraniectomy                                   | 18 adult patients                 | Retrospective observational study | Favorable. Survival rates were 62.5% at 1 year                                                                                                           |
|  |          | Ramnarayan, R, et al. (24) | 2009 | Hemicraniectomy                                   | 23 adult patients                 | Retrospective observational study | Favorable in 13, Unfavorable in 10(including 3 deaths)                                                                                                   |
|  |          | Pranesh, M. B, et al.(25)  | 2003 | Hemicraniectomy                                   | 19 adult patients                 | Case series                       | The functional outcome is good in younger patients                                                                                                       |
|  |          | Pillai, A, et al.(26)      | 2007 | Hemicraniectomy                                   | 26 adult patients                 | Non-randomized prospective study  | Favorable.73% survival at 1-year follow up. Among survivors 72% were independent at 1-year follow up                                                     |
|  |          |                            |      |                                                   |                                   |                                   |                                                                                                                                                          |

#### Cerebral Venous Sinus Thrombosis (CVST)

|                                          |          |                                    |      |                          |                    |                                   |                                                            |
|------------------------------------------|----------|------------------------------------|------|--------------------------|--------------------|-----------------------------------|------------------------------------------------------------|
| East Asia Pacific                        | China    | Zhang, S, et al (27)               | 2017 | Unilateral               | 58 adults patients | Retrospective observational study | 56.9% favorable outcome, 13,8% died                        |
| Middle East, North Africa and South Asia | Pakistan | Raza, E, et al. (28)               | 2014 | Hemicraniectomy          | 7 adult patients   | Case series                       | Favorable in those who had reactive pupils pre-operatively |
|                                          | India    | Rajan Vivakaran, T. T, et al. (29) | 2014 | Hemicraniectomy          | 34 adult patients  | Retrospective observational study | Favorable. 26 (76.4%) had GOS 4 or 5                       |
|                                          |          | Aaron, S, et al. (30)              | 2013 | Unilateral and bilateral | 44 adult patients  | Retrospective observational study | Favorable, Mortality was 9 (20%)                           |
|                                          |          | Mohindra, S, et al. (31)           | 2011 | Hemicraniectomy          | 13 adult patients  | Retrospective observational study | Favorable. 11 (84.6%) survived with GOS 4 or 5             |
|                                          |          | Lath, R, et al. (32)               | 2010 | Hemicraniectomy          | 11 adult patients  | Retrospective observational study | Favorable. 73% survival and died 27%                       |

1. VITAL RB, HAMAMOTO FILHO PT, LUVIZUTTO GJ, et al. Decompressive Hemicraniectomy in a South American Population--Morbidity and Outcomes Analysis. *PLoS One*. 2016 Jan 14;11(1):e0146747. doi: 10.1371/journal.pone.0146747.
2. RABELO NN, FERRARI MA, RABELO NN et al. Descompressive Craniectomy in Aneurysms surgery. When and how to do it?. *Rev. Chil. Neurocirugía*. 2017;43(1):150-155
3. SILVA F, SALGADO SA, RUIZ N, et al. Hemicranectomia en pacientes con ataque cerebro vascular isquémico extenso: aspectos relevantes a propósito de una serie de casos. *Acta Neurol Colomb*. 2011;27(1):137-145
4. HAO, Z., CHANG, X., ZHOU, H., LIN, S., & LIU, M. (2015). A Cohort Study of Decompressive Craniectomy for Malignant Middle Cerebral Artery Infarction. *Medicine*, 94(25), e1039.
5. SHAO, A., GUO, S., CHEN, S., SUN, C., WU, H., HONG, Y., & ZHANG, J. (2013). Comparison Between Routine and Improved Decompressive Craniectomy on Patients With Malignant Cerebral Artery Infarction Without Traumatic Brain Injury. *Journal of Craniofacial Surgery*, 24(6), 2085–2088.
6. ZHAO, J., SU, Y. Y., ZHANG, Y., ZHANG, Y. Z., ZHAO, R., WANG, L., GAO, D. (2012). Decompressive Hemicraniectomy in Malignant Middle Cerebral Artery Infarct: A Randomized Controlled Trial Enrolling Patients up to 80 Years Old. *Neurocritical Care*, 17(2), 161–171.
7. CHEN, C.-C., CHO, D.-Y., & TSAI, S.-C. (2007). Outcome and Prognostic Factors of Decompressive Hemicraniectomy in Malignant Middle Cerebral Artery Infarction. *Journal of the Chinese Medical Association*, 70(2), 56–60.
8. YAO, Y., LIU, W., YANG, X., HU, W., & LI, G. (2005). Is decompressive craniectomy for malignant middle cerebral artery territory infarction of any benefit for elderly patients? *Surgical Neurology*, 64(2),
9. YANG, X., YAO, Y., HU, W., LI, G., XU, J., ZHAO, X., & LIU, W. (2005). Is decompressive craniectomy for malignant middle cerebral artery infarction of any worth?. *Journal Of Zhejiang University SCIENCE*, 6B(7), 644-649.
10. CHO, D., CHEN, T., & LEE, H. (2003). Ultra-early decompressive craniectomy for malignant middle cerebral artery infarction. *Surgical Neurology*, 60(3), 227-232.
11. ZHAO, B., ZHAO, Y., TAN, X., CAO, Y., WU, J., ZHONG, M., & WANG, S. (2015). Primary decompressive craniectomy for poor-grade middle cerebral artery aneurysms with associated intracerebral hemorrhage. *Clinical Neurology and Neurosurgery*, 133, 1–5.
12. RAFFIQ, M. A., HASPANI, M. S., KANDASAMY, R., & ABDULLAH, J. (2014). Decompressive craniectomy for malignant middle cerebral artery infarction: Impact on mortality and functional outcome. *Surgical Neurology International*, 5(1), 102.
13. GULENSOY, B., KARATAY, M., ERDEM, Y., CELIK, H., TASCIOGLU, T., & SERTBAS, I. et al. (2014). Decompressive hemicraniectomy for malignant middle cerebral artery infarct. *Turkish Neurosurgery*.
14. KILINCER, C., ASIL, T., UTKU, U., HAMAMCIOGLU, M. K., TURGUT, N., HICDONMEZ, T. COBANOGU, S. (2005). Factors affecting the outcome of decompressive craniectomy for large hemispheric infarctions: a prospective cohort study. *Acta Neurochirurgica*, 147(6), 587–594
15. RAHMANIAN, A., SEIFZADEH, B., RAZMKON, A., PETRAMFAR, P., KIVELEV, J., ALIBAI, E. A. & HERNESNIEMI, J. (2014). Outcome of decompressive craniectomy in comparison to nonsurgical treatment in patients with malignant MCA infarction. *Springerplus*,3,115.
16. RASRAS, S., SAFARI, H., ZEINALI, M. & JAHANGIRI, M. (2018). Decompressive hemicraniectomy without clot evacuation in supratentorial deep-seated intracerebral hemorrhage. *Clin Neurol Neurosurg*,174,1-6.
17. MOUSSA, W. M. & KHEDR, W. (2017). Decompressive craniectomy and expansive duraplasty with evacuation of hypertensive intracerebral hematoma, a randomized controlled trial. *Neurosurg Rev*,40,115-127.
18. KAMAL ALAM, B., BUKHARI, A. S., ASSAD, S., MUHAMMAD SIDDIQUE, P., GHAZANFAR, H., NIAZ, M. J., KUNDI, M., SHAH, S. & SIDDIQUI, M. (2017). Functional Outcome After Decompressive Craniectomy in Patients with Dominant or Non-Dominant Malignant Middle Cerebral Infarcts. *Cureus*,9,e997.
19. KHATRI, I. A., SIDDIQUI, M., KHAN, I., NADEEM, M. & AHMAD, A. (2008). Salvage decompressive craniectomy in malignant MCA infarcts--results of local experience at Shifa International Hospital, Islamabad, Pakistan. *J Pak Med Assoc*,58,404-8.
20. KHAN, I., DIN JANJUA, M. B. U., KHATRI, I. A., & NADEEM, M. (2010). Surgical decompression in massive cerebellar stroke. *Rawal Medical Journal*, 35(1), 96-100.
21. RAI, V. K., BHATIA, R., PRASAD, K., PADMA SRIVASTAVA, M. V., SINGH, S., RAI, N. & SURI, A. (2014). Long-term outcome of decompressive hemicraniectomy in patients with malignant middle cerebral artery infarction: a prospective observational study. *Neurol India*,62,26-31.
22. BANSAL, H., CHAUDHARY, A., SINGH, A., PAUL, B. & GARG, R. (2015). Decompressive craniectomy in malignant middle cerebral artery infarct: An institutional experience. *Asian J Neurosurg*,10,203-6.
23. KUMAR, A., SHARMA, M. S., SHARMA, B. S., BHATIA, R., SINGH, M., GARG, A., KUMAR, R., SURI, A., CHANDRA, P. S., KALE, S. S. & MAHAPATRA, A. K. (2013). Outcome after decompressive craniectomy in patients with dominant middle cerebral artery infarction: A preliminary report. *Ann Indian Acad Neurol*,16,509-15.
24. RAMNARAYAN, R., ANTO, D., ANILKUMAR, T. V. & NAYAR, R. (2009). Decompressive hemicraniectomy in large putaminal hematomas: an Indian experience. *J Stroke Cerebrovasc Dis*,18,1-10.
25. PRANESH, M. B., DINESH NAYAK, S., MATHEW, V., PRAKASH, B., NATARAJAN, M., RAJMOHAN, V., MURALI, R. & PEHLAJ, A. (2003). Hemicraniectomy for large middle cerebral artery territory infarction: outcome in 19 patients. *J Neurol Neurosurg Psychiatry*,74,800-2.
26. PILLAI, A., MENON, S. K., KUMAR, S., RAJEEV, K., KUMAR, A. & PANIKAR, D. (2007). Decompressive hemicraniectomy in malignant middle cerebral artery infarction: an analysis of long-term outcome and factors in patient selection. *J Neurosurg*,106,59-65.
27. ZHANG, S., ZHAO, H., LI, H., YOU, C., & HUI, X. (2017). Decompressive craniectomy in hemorrhagic cerebral venous thrombosis: clinicoradiological features and risk factors. *Journal Of Neurosurgery*, 127(4), 709-715. doi: 10.3171/2016.8.jns161112

28. RAZA, E., SHAMIM, M. S., WADIWALA, M. F., AHMED, B. & KAMAL, A. K. (2014). Decompressive surgery for malignant cerebral venous sinus thrombosis: a retrospective case series from Pakistan and comparative literature review. *J Stroke Cerebrovasc Dis*,23,e13-22.
29. RAJAN VIVAKARAN, T. T., SRINIVAS, D., KULKARNI, G. B. & SOMANNA, S. (2012). The role of decompressive craniectomy in cerebral venous sinus thrombosis. *J Neurosurg*,117,738-44.
30. AARON, S., ALEXANDER, M., MOORTHY, R. K., MANI, S., MATHEW, V., PATIL, A. K., SIVADASAN, A., NAIR, S., JOSEPH, M., THOMAS, M., PRABHU, K., JOSEPH, B. V., RAJSHEKHAR, V. & CHACKO, A. G. (2013). Decompressive craniectomy in cerebral venous thrombosis: a single centre experience. *J Neurol Neurosurg Psychiatry*,84,995-1000.
31. MOHINDRA, S., UMREDKAR, A., SINGLA, N., BAL, A. & GUPTA, S. K. (2011). Decompressive craniectomy for malignant cerebral oedema of cortical venous thrombosis: an analysis of 13 patients. *Br J Neurosurg*,25,422-9.
32. LATH, R., KUMAR, S., REDDY, R., BOOLA, G. R., RAY, A., PRABHAKAR, S. & RANJAN, A. (2010). Decompressive surgery for severe cerebral venous sinus thrombosis. *Neurol India*,58,392-7.

**Supplemental Table 3**

| OTHER PATHOLOGIES                        |           |                            |           |      |                                           |                                                                                                                                                   |               |                                                                                                                                                                                               |
|------------------------------------------|-----------|----------------------------|-----------|------|-------------------------------------------|---------------------------------------------------------------------------------------------------------------------------------------------------|---------------|-----------------------------------------------------------------------------------------------------------------------------------------------------------------------------------------------|
| Region                                   | Country   | Author                     | Pathology | Year | Procedure type                            | Type and Size of population                                                                                                                       | Type of study | Outcome                                                                                                                                                                                       |
| Latin America and Caribbean Region       | Argentina | Montaña S, et al. (1)      | Infection | 2017 | Unilateral DC                             | A. schindleri (As190) blaNDM-1-positive strain isolated in a 52-year-old woman with a history of positive serology for HIV and hepatitis C virus. | Case report   | After being treated with ceftazidime for 4 weeks and then discharged with good clinical evolution.                                                                                            |
|                                          | Brazil    | Oliveira FA, et al. (2)    | Infection | 2018 | Posterior fossa decompressive craniectomy | A 8 year old boy who presented with Chiari I malformation and recurrent meningitis without fistula                                                | Case report   | The patient died due to destruction of the cervical skull transition and consequent medullary bulb compression                                                                                |
|                                          | Peru      | Rojas-Jaimes J, et al. (3) | Infection | 2017 | Unilateral DC                             | Pharyngitis in a 12-year-old girl which later developed into a subdural empyema caused by the bacteria <i>Peptostreptococcus</i> sp               | Case report   | Seven months after hospital discharge the patient received cranioplasty with miniplates to restore the skullcap                                                                               |
|                                          | Argentina | Iaconis J, et al. (4)      | Tumor     | 2018 | Unilateral DC                             | A 5 year old girl                                                                                                                                 | Case report   | The patient passed away six months later.                                                                                                                                                     |
|                                          | Mexico    | Monroy-Sosa A, et al. (5)  | Tumor     | 2018 | Unilateral DC                             | A 34-year-old male with brain angiomatosis from a non-seminomatous germ cell tumor                                                                | Case report   | The patient showed good recovery in terms of his overall status in the first month after surgery, but the remaining brain metastases grew and bled with rostrocaudal deterioration and death. |
| Middle East, North Africa and South Asia | India     | Singhi, P et al (6)        | Infection | 2014 | Hemicraniectomy                           | 1 pediatric patient                                                                                                                               | Case report   | At discharge, he had normal sensorium and memory and recovering aphasia, residual right hemiparesis, ptosis, and asymmetry of lower half of the face.                                         |

|                                          |            |                       |                                                    |      |                 |                                          |                                     |                                                                                                                                                                |
|------------------------------------------|------------|-----------------------|----------------------------------------------------|------|-----------------|------------------------------------------|-------------------------------------|----------------------------------------------------------------------------------------------------------------------------------------------------------------|
|                                          |            | Agarwal et al (7)     | Infection                                          | 2005 | Hemicraniectomy | 1 adult patient                          | Case report                         | The patient improved remarkably following surgery. He became conscious and his Glasgow Coma Score improved to 14.                                              |
| Europe & Central Asia                    | Turkey     | Tuzgen S, et al (8)   | Vasospasm after aneurysmal subarachnoid hemorrhage | 2012 | Unilateral      | 6 adults patients                        | Case series                         | After one year, 1 patient died, 2 patients had moderate disability (mRS of 4) and 3 patients continue their life with minimal deficit and no major dependency. |
| Middle East, North Africa and South Asia | Bangladesh | Rahman, M, et al. (9) | TBI, MCA infarct, ICH, ASDH                        | 2017 | Unilateral      | 32 adult patients                        | Cross-sectional observational study | Improves survival but quality of life limited especially in poor GCS income (3-6) group.                                                                       |
|                                          | India      | Mathai et al (10)     | Increased ICP(TBI, MCA infarct, CVST)              | 2008 | Hemicraniectomy | 12 adult patients                        | Cohort study                        | 4 patients in this cohort died, while 5 had good outcomes                                                                                                      |
|                                          |            | Salunke et al. (11)   | Large demyelinating lesions                        | 2012 | Hemicraniectomy | 8 adult patients                         | Case series                         | Favorable, 3 from 8 patient died                                                                                                                               |
|                                          |            | Singh et al. (12)     | Intracerebral hemorrhage in acute leukemia         | 2017 | Hemicraniectomy | 2 pediatric patients with acute leukemia | Case report                         | In both patients the neurological status improved after DC with hemiparesis, which improved gradually.                                                         |

- MONTAÑA, S., PALOMBARANI, S., CARULLA, M., et al. (2018) First case of bacteraemia due to *Acinetobacter schindlerii* harbouring bla<sub>NDM-1</sub> in an immunocompromised patient. *New Microbe and New Infect.* 21:28–30. (ARGENTINA)
- OLIVEIRA, FA., MOREIRA FABIÃO, O., GIBBON, FL., et al. (2018). Gorham's Syndrome Associated with Chiari I Malformation and Recurrent Meningitis without Fistula: Case Report. *Journal of Clinical and Diagnostic Research.* 12(5): PD17-PD19. doi: 10.7860/JCDR/2018/35304.11565
- ROJAS-JAIMES, J., DIAZ-TELLO, A., CARPIO BAZÁN, C.. (2017). Subdural empyema caused by *Peptostreptococcus* sp.: a complication of acute pharyngitis. *Rev Inst Med Trop São Paulo.* 59:e83.
- IACONIS, J., COPPOLA, F., VOLPE, E., et al. (2018). Hemorrhagic Presentation of Isolated CNS Neuroblastoma Recurrence: Case Report. *EC Neurology.* 10(9):848-851. (ARGENTINA)
- MONROY-SOSA, A., REYES-SOTO, G., CACHO-DÍAZ, B. (2018) Brain angiomatosis from a non-seminomatous germ cell tumor: A case report. *Int J Surg Case Rep.* 42:44-49. doi: 10.1016/j.ijscr.2017.11.053
- SINGHI, P., SAINI, A. G., SAHU, J. K., KUMAR, N., VYAS, S., VASISHTA, R. K. & AGGARWAL, A. (2015). Unusual Clinical Presentation and Role of Decompressive Craniectomy in Herpes Simplex Encephalitis. *J Child Neurol*,30,1204-7.
- AGRAWAL, D. & HUSSAIN, N. (2005). Decompressive craniectomy in cerebral toxoplasmosis. *Eur J Clin Microbiol Infect Dis*,24,772-3.
- TUZGEN, S., ABUZAYED, B., KUCUKYURUK, B., OZLEN, F., KIZILKILIC, O., & AYDIN, S. (2012). Decompressive craniectomy in patients with cerebral infarction due to malignant vasospasm after aneurysmal subarachnoid hemorrhage. *Journal Of Neurosciences In Rural Practice*, 3(3), 251. doi: 10.4103/0976-3147.102598
- RAHMAN, M. M., UDDIN, K. H., HARUN, K., BARUA, K. K., KHAN, A. M., & SALAM, M. A. (2017). Surgical Outcome of Decompressive Craniectomy: Study of 32 Cases. *Journal of National Institute of Neurosciences Bangladesh*, 3(2), 80-83.
- MATHAI, K. I. & SAHOO, P. K. 2008. Decompressive craniectomy: an effective but underutilized option for intracranial pressure management. *Indian J Surg*,70,181-3.
- SALUNKE, P., AGGARWAL, A., GUPTA, K., AGRAWAL, P., AHUJA, C. K. & VASISHTA, R. K. 2012. Large demyelinating lesions: a neurosurgical perspective. *Br J Neurosurg*,26,490-8.
- SINGH, J., GARG, K., SHARMA, R., SINHA, S. & KALE, S. S. 2017. Damage control surgery in intracerebral hemorrhage in acute leukemia: a review of two cases. *Childs Nerv Syst*,33,1229-1232.
